# Supplementary material
Source: PubMed Central journal article supplement (PMC7073920)
Supplement: djz110_supplementary_data.pdf [file djz110_supplementary_data.pdf]

## **SUPPLEMENTARY MATERIALS**

### **Supplementary Methods**

#### ***Cost-accounting***

Prospective cost-accounting was embedded in the intervention arm of the randomized controlled trial of persons aged 50-75 years who were not up-to-date with colorectal cancer (CRC) screening (NCT02613260, initiated December 2015). We reviewed published literature on CRC screening program costs and decided to use cost categories defined by the Centers for Disease Control and Prevention Colorectal Cancer Screening Demonstration Project. We selected the relevant cost categories for the current study from the CDC's project participants user guide for cost collection.<sup>1</sup> The program components were separated into sets of fixed or variable costs. The variable costs consisted of the various activities performed by the program manager and outreach workers. Clinical activities were considered separately from research activities. Data related to staff time and costs associated with outreach activities and materials were collected in three 2-month periods (February - March and September - October 2016 and June - July 2017) in an electronic database.

During these three time periods, we accounted for all direct patient-related activities (assembling kits, postcard and kit mailings, phone calls, data management) as well as program-related activities (budgeting, hiring, assessment of outreach workers, inventory and supplies management). Average minutes spent per patient on each activity were calculated and average costs per patient were estimated based on individual salaries and benefits of responsible staff. In addition, average costs of materials and supplies per

patient were calculated. The total average per patient cost associated with outreach was calculated as the sum of the average costs per patient of direct patient related activities, program related activities and materials per patient. One-time start-up costs to establish the program, including staff training, were ascertained separately.

For the calls preceding direct mail of FIT kits, 43% of calls connected with an individual, 33% resulted in a voicemail, 9% could not be reached, and 15% were not called (e.g., already up to date, moved, no longer active in network.). During reminder phone calls, 30% of patients answered their phones over two attempted calls, 31% were left voicemails, 9% could not be reached, and 30% were not called.

### ***Decision analytic model***

We adapted our published, validated decision analytic Markov cohort model of CRC screening in the U.S for the current analyses. The original model for the general U.S. population, its calibration and initial validation have been described in detail.<sup>2-7</sup> The model is constructed in TreeAge Pro (TreeAge Software, Inc., Williamstown, MA). The Natural History module reproduces the natural history and age-specific incidence and prevalence of colorectal adenomas and CRC by stage in the U.S. without screening.<sup>2,4,6</sup> Screening strategies are superimposed on the Natural History module.

Persons transition between health states of normal, small polyp, large polyp, localized, regional or disseminated CRC, and dead, in 1-year cycles (Figure A2). Beginning at age 50 years, average-risk persons progress through the model for 50 1-year cycles, until age 100 years or death. Age-specific non-CRC mortality rates reflect U.S. life table data.<sup>8</sup>

Approximately 85% of CRCs develop through a potentially identifiable precursor. In the Natural History module, CRCs are diagnosed with colonoscopy once they lead to symptoms.

Screening is superimposed on the natural history module, resulting in CRC prevention or early detection as determined by screening test performance characteristics, and patient participation.<sup>4,9,10</sup> Screening and surveillance are offered from age 50 to 80, with persons followed until age 100 or death. If fecal immunochemical test (FIT) is positive, colonoscopy is offered, and if colonoscopy is normal, the screening test is assumed to be a false-positive and screening is resumed in 10 years with FIT. With colonoscopy, polyps are removed and CRCs are biopsied if detected. Persons with adenomas enter colonoscopic surveillance as described previously<sup>2,4,6,7</sup>. Colonoscopy is performed within one year of CRC diagnosis, and three years and then every five years after CRC diagnosis.<sup>11</sup>

The model inputs are derived from autopsy data on polyp prevalence; Surveillance, Epidemiology, and End Results (SEER) data on CRC incidence and stage distribution from dates preceding widespread CRC screening; clinical studies on test performance characteristics and complication rates, outcomes after CRC treatment, and CRC-related quality of life; U.S. Life Tables data; and Medicare payments rates (Appendix Table 1).

### ***Model validation***

We have performed four validation exercises for the outcomes of CRC incidence and CRC mortality (and overall mortality when reported in the comparator clinical trial) predicted by our model, compared against the results of randomized controlled trials of fecal occult blood testing (FOBT) and screening sigmoidoscopy, with the time horizon of each validation exercise determined by the time horizon of the comparator clinical trial.

## **FOBT**

Our first validation exercise<sup>4</sup> was against data from the Minnesota Colon Cancer Control Study.<sup>12,13</sup> FOBT screening was modeled by intent-to-treat as in the trial, assuming mean age 62 years; annual FOBT offered for five years, then not for five years, and then again for six years; adherence rates with at least one screening of 90% and all screenings of 46%; and complete bowel exam after 83% of abnormal FOBTs. For screening compared with no screening, our model predicted relative rates of CRC incidence of 0.79 vs. 0.80 (CI 0.70-0.90) in the trial, and CRC mortality of 0.64 vs. 0.67 (CI 0.50-0.87) in the trial.<sup>12,13</sup>

## **Sigmoidoscopy**

We performed three validation exercises<sup>9</sup> against data from the United Kingdom Flexible Sigmoidoscopy Trial,<sup>14</sup> the SCORE Trial,<sup>15</sup> and the PLCO Cancer Screening Trial.<sup>16</sup> For validation against the United Kingdom Flexible Sigmoidoscopy Trial,<sup>14</sup> screening sigmoidoscopy was modeled by intent-to-treat and per-protocol, assuming a population of mean age 60 years, once-only sigmoidoscopy taken up by 71% of persons, colonoscopic surveillance only after detection of a large adenoma, 11 year follow-up, and 60% of lesions within reach of the sigmoidoscope. For screening compared with no screening by intent-to-treat, our model predicted relative rates of CRC incidence of 0.75 vs. 0.77 (CI 0.70-0.84) in the trial, CRC mortality of 0.67 vs. 0.69 (CI 0.59-0.82) in the trial, and all-cause mortality of 0.99 vs. 0.97 (CI 0.94-1.0) in the trial.<sup>14</sup> For screening compared with no screening per-protocol, our model predicted relative rates of CRC incidence of 0.65 vs. 0.67 (CI 0.60-0.76)

in the trial, CRC mortality of 0.55 vs. 0.57 (CI 0.45-0.72) in the trial, and all-cause mortality of 0.99 vs. 0.95 (CI 0.91-1.0) in the trial.<sup>14</sup>

For validation against the SCORE trial,<sup>15</sup> screening sigmoidoscopy was modeled by intent-to-treat and per-protocol as in the trial, assuming a population of mean age 60 years, once-only sigmoidoscopy taken up by 58% of persons, colonoscopic surveillance after detection of a small or large adenoma, 11 year follow-up, and 60% of lesions within reach of the sigmoidoscope. For screening compared with no screening by intent-to-treat, our model predicted relative rates of CRC incidence of 0.80 vs. 0.82 (0.69 to 0.96) in the trial, and CRC mortality of 0.72 vs. 0.78 (0.56-1.08) in the trial.<sup>15</sup> For screening compared with no screening per-protocol, our model predicted relative rates of CRC incidence of 0.65 vs. 0.69 (0.56 to 0.86) in the trial, and CRC mortality of 0.55 vs. 0.62 (0.40 - 0.96) in the trial.<sup>15</sup>

We performed a third validation exercise against data from the PLCO trial,<sup>16</sup> which was more complicated due to the variability in screening and “endoscopic contamination” in both the intervention and usual care control arms. Screening sigmoidoscopy was modeled as it was actually performed in the trial, assuming a population of mean age 63 years, colonoscopic surveillance after detection of a small or large adenoma, 11-year follow-up, and 60% of lesions within reach of the sigmoidoscope. Based on the actual reported rates of endoscopic testing in the intervention arm, we modeled 36% of persons undergoing sigmoidoscopy only once, 51% undergoing repeat sigmoidoscopy, and 6% undergoing colonoscopy during the screening period. Similarly, for the control arm we modeled 47% of persons undergoing screening by colonoscopy (34%) or sigmoidoscopy once (13%) during the screening period. For the intervention arm compared to usual care,

our model predicted relative rates of CRC incidence of 0.83 vs. 0.79 (0.72 to 0.85) in the trial, and CRC mortality of 0.72 vs. 0.74 (0.63 to 0.87) in the trial.<sup>16</sup>

### ***Cost-effectiveness Analysis***

#### **General study design for cost-effectiveness Analysis**

We adapted our validated model of CRC screening in the general U.S. population<sup>4,9</sup> to allow complex screening participation patterns over time and to consider the incremental cost of patient outreach for FIT-based CRC screening. First, we explored the potential effectiveness and cost-effectiveness of patient outreach to improve FIT-based screening participation rates, based on the clinical and economic results of the prospective randomized trial. Second, we performed sensitivity analyses as described below.

#### **Screening participation behavior patterns**

We created cohorts made up of sub-cohorts with different longitudinal screening participation patterns: consistent screeners, with participation in every screening round; intermittent screeners, who participated at least once over two cycles of screening including late entry and dropouts; and consistent non-responders.<sup>17,18</sup> The population proportions in each group were derived based on the 2-year participation rates in our prospective trial. The ratios for consistent to intermittent screeners observed in the trial were 1.8:1 with the outreach intervention and 0.65:1 with usual care. Published studies suggest that, among intermittent screeners, the fraction of screening cycles completed is distributed relatively evenly from the minimum to maximum possible.<sup>12,17-28</sup> Thus, we modeled this subcohort as made up of 5 equal-size sub-subcohorts with participation

probabilities/cycle of 0.1, 0.3, 0.5, 0.7 or 0.9. As in our previous published work, we extrapolated these screening behavior patterns over the simulation's time horizon.

In the base case, the overall screening participation rate with outreach was 57.9% in the first cycle, with 45.3% consistent and 25.1% intermittent screeners over time; with usual care, the overall screening participation rate was 37.4% in the first cycle, with 21.2% consistent and 32.5% intermittent screeners over time. In sensitivity analyses, we covered the higher and lower ends of participation rates observed across clinics in our prospective trial.

### **Cost inputs**

Base case cost inputs were derived from Medicare reimbursement rates<sup>29-31</sup> and estimated CRC care costs<sup>32</sup> and updated to 2018 dollars using the medical component of the consumer price index (Appendix Table A1). Base case outreach related costs were derived from our prospective cost accounting in the clinical trial. In sensitivity analysis, we explored the outreach cost threshold that would make outreach cost-saving, as well as illustrative lower end and higher end values (e.g. \$50 for outreach including FIT kit costs).

### **Colonoscopy follow-up rate after a positive FIT test**

In the base case, the follow-up rate for colonoscopy was 55.6% with both outreach and usual care, based on the rate at which patients completed a colonoscopy within a year after a positive FIT in a previous retrospective cohort study conducted in the same integrated safety-net system.<sup>33</sup> In sensitivity analysis we considered a 20% higher follow-up rate of

colonoscopy with navigation for follow-up colonoscopy, as we have modeled previously for screening colonoscopy based on published literature on navigation.<sup>34,35</sup>

### **Clinical and economic outcomes**

The principal model outputs were quality-adjusted life-years (QALYs) and costs per person.<sup>36,37</sup> Future QALYs and costs were discounted by 3% annually.<sup>38</sup> Health state utilities for CRC by stage (Appendix Table 1) were used to calculate QALYs by applying these for five years after CRC diagnosis.

### **Cost-effectiveness analyses**

Analyses from the perspective of a third-party payer<sup>39</sup> were performed in TreeAge Pro (TreeAge Software, Inc., Williamstown, MA) and Excel 2010 (Microsoft Corporation, Redmond, WA). Incremental cost-effectiveness ratios were calculated.<sup>36,37</sup> A base case analyses and sensitivity analyses were performed as detailed above.



**REFERENCES**

1. Subramanian S, Hoover S, Tangka F. Colorectal Cancer Control Program Cost Assessment Tool User's Guide (Instructions for Program Year 2011-2012 Data Collection), CDC Contract No. 200-2008-27958 Task 1. *Centers for Disease Control and Prevention*. 2012.
2. Ladabaum U, Chopra CL, Huang G, Scheiman JM, Chernew ME, Fendrick AM. Aspirin as an adjunct to screening for prevention of sporadic colorectal cancer. A cost-effectiveness analysis. *Ann Intern Med*. 2001;135(9):769-781.
3. Ladabaum U, Phillips KA. Colorectal cancer screening: Differential costs for younger versus older Americans. *American Journal of Preventive Medicine*. 2006;30:378-384.
4. Ladabaum U, Song K. Projected national impact of colorectal cancer screening on clinical and economic outcomes and health services demand. *Gastroenterology*. 2005;129(4):1151-1162.
5. Ladabaum U, Song K, Fendrick AM. Colorectal neoplasia screening with virtual colonoscopy: when, at what cost, and with what national impact? *Clin Gastroenterol Hepatol*. 2004;2(7):554-563.
6. Song K, Fendrick AM, Ladabaum U. Fecal DNA testing compared to conventional colorectal cancer screening methods: A decision analysis. *Gastroenterology*. 2004;126(5):1270-1279.
7. Parekh M, Fendrick AM, Ladabaum U. As tests evolve and costs of cancer care rise: reappraising stool-based screening for colorectal neoplasia. *Alimentary pharmacology & therapeutics*. 2008;27(8):697-712.

8. Arias E, Heron M, Xu J. United States life tables, 2014. National vital statistics reports; vol 66 no 4. Hyattsville, MD: National Center for Health Statistics. 2017. Accessed at [https://www.cdc.gov/nchs/data/nvsr/nvsr66/nvsr66\\_04.pdf](https://www.cdc.gov/nchs/data/nvsr/nvsr66/nvsr66_04.pdf) on, May 22, 2018.
9. Sharaf RN, Ladabaum U. Comparative Effectiveness and Cost-Effectiveness of Screening Colonoscopy vs. Sigmoidoscopy and Alternative Strategies. *Am J Gastroenterol*. 2013;108(1):120-132.
10. Ladabaum U, Allen J, Wandell M, Ramsey SD. Colorectal Cancer Screening with Blood-Based Biomarkers: Cost-Effectiveness of Methylated Septin 9 DNA vs. Current Strategies. *Cancer Epidemiol Biomarkers Prev*. 2013;22(9):1567-1576.
11. Levin B, Lieberman DA, McFarland B, et al. Screening and surveillance for the early detection of colorectal cancer and adenomatous polyps, 2008: a joint guideline from the American Cancer Society, the US Multi-Society Task Force on Colorectal Cancer, and the American College of Radiology. *Gastroenterology*. 2008;134(5):1570-1595.
12. Mandel JS, Bond JH, Church TR, et al. Reducing mortality from colorectal cancer by screening for fecal occult blood. Minnesota Colon Cancer Control Study. *N Engl J Med*. 1993;328(19):1365-1371.
13. Mandel JS, Church TR, Bond JH, et al. The effect of fecal occult-blood screening on the incidence of colorectal cancer. *N Engl J Med*. 2000;343(22):1603-1607.
14. Atkin WS, Edwards R, Kralj-Hans I, et al. Once-only flexible sigmoidoscopy screening in prevention of colorectal cancer: a multicentre randomised controlled trial. *Lancet*. 2010;375(9726):1624-1633.

15. Segnan N, Armaroli P, Bonelli L, et al. Once-only sigmoidoscopy in colorectal cancer screening: follow-up findings of the Italian Randomized Controlled Trial--SCORE. *J Natl Cancer Inst.* 2011;103(17):1310-1322.
16. Schoen RE, Pinsky PF, Weissfeld JL, et al. Colorectal-cancer incidence and mortality with screening flexible sigmoidoscopy. *N Engl J Med.* 2012;366(25):2345-2357.
17. Duncan A, Turnbull D, Wilson C, et al. Behavioural and demographic predictors of adherence to three consecutive faecal occult blood test screening opportunities: A population study. *BMC Public Health.* 2014;14(1).
18. Lo SH, Halloran S, Snowball J, Seaman H, Wardle J, von Wagner C. Colorectal cancer screening uptake over three biennial invitation rounds in the English bowel cancer screening programme. *Gut.* 2015;64(2):282-291.
19. Crotta S, Segnan N, Paganin S, Dagnes B, Rosset R, Senore C. High rate of advanced adenoma detection in 4 rounds of colorectal cancer screening with the fecal immunochemical test. *Clin Gastroenterol Hepatol.* 2012;10(6):633-638.
20. Rossi PG, Vicentini M, Sacchetti C, et al. Impact of Screening Program on Incidence of Colorectal Cancer: A Cohort Study in Italy. *American Journal of Gastroenterology.* 2015;110(9):1359-1366.
21. Kapidzic A, Grobbee EJ, Hol L, et al. Attendance and yield over three rounds of population-based fecal immunochemical test screening. *American Journal of Gastroenterology.* 2014;109(8):1257-1264.
22. Jensen CD, Corley DA, Quinn VP, et al. Fecal Immunochemical Test Program Performance Over 4 Rounds of Annual Screening: A Retrospective Cohort Study. *Ann Intern Med.* 2016;164(7):456-463.

23. Wong MCS, Ching JYL, Lam TYT, et al. Prospective cohort study of compliance with faecal immunochemical tests for colorectal cancer screening in Hong Kong. *Preventive Medicine*. 2013;57(3):227-231.
24. Liang PS, Wheat CL, Abhat A, et al. Adherence to Competing Strategies for Colorectal Cancer Screening Over 3 Years. *Am J Gastroenterol*. 2016;111(1):105-114.
25. Hardcastle JD, Armitage NC, Chamberlain J, Amar SS, James PD, Balfour TW. Fecal occult blood screening for colorectal cancer in the general population. Results of a controlled trial. *Cancer*. 1986;58(2):397-403.
26. Hardcastle JD, Chamberlain JO, Robinson MH, et al. Randomised controlled trial of faecal-occult-blood screening for colorectal cancer. *Lancet*. 1996;348(9040):1472-1477.
27. Kewenter J, Brevinge H, Engaras B, Haglind E, Ahren C. Results of screening, rescreening, and follow-up in a prospective randomized study for detection of colorectal cancer by fecal occult blood testing. Results for 68,308 subjects. *Scandinavian journal of gastroenterology*. 1994;29(5):468-473.
28. Lindholm E, Brevinge H, Haglind E. Survival benefit in a randomized clinical trial of faecal occult blood screening for colorectal cancer. *Br J Surg*. 2008;95(8):1029-1036.
29. Centers for Medicare & Medicaid Services. Clinical Laboratory Fee Schedule 2018. Accessed at <http://www.cms.gov/Medicare/Medicare-Fee-for-Service-Payment/ClinicalLabFeeSched/> on May 21, 2018.
30. Centers for Medicare & Medicaid Services. Physician Fee Schedule 2018. Accessed at <http://www.cms.gov/Medicare/Medicare-Fee-for-Service-Payment/PhysicianFeeSched/> on May 21, 2018.

31. Centers for Medicare & Medicaid Services. Inpatient Prospective Payment System 2018. Accessed at <http://www.cms.gov/Medicare/Medicare-Fee-for-Service-Payment/AcuteInpatientPPS/> on May 21, 2018.
32. Zauber A, G., Lansdorp-Vogelaar I, Wilschut J, Knudsen AB, van Ballegooijen M, Kuntz KM. Technology Assessment: Cost-Effectiveness of DNA Stool Testing to Screen for Colorectal Cancer. *Report to AHRQ and CMS from the Cancer Intervention and Surveillance Modeling Network (CISNET) for MISCAN and SimCRC Models*. 2007.
33. Issaka RB, Singh MH, Oshima SM, et al. Inadequate Utilization of Diagnostic Colonoscopy Following Abnormal FIT Results in an Integrated Safety-Net System. *Am J Gastroenterol*. 2017;112(2):375-382.
34. Jandorf L, Stossel LM, Cooperman JL, et al. Cost analysis of a patient navigation system to increase screening colonoscopy adherence among urban minorities. *Cancer*. 2013;119(3):612-620.
35. Ladabaum U, Mannalithara A, Jandorf L, Itzkowitz S. Cost-Effectiveness of Patient Navigation to Increase Adherence with Screening Colonoscopy Among Minority Individuals. *Cancer*. 2015;121(7):1088-1097.
36. Siegel JE, Weinstein MC, Russell LB, Gold MR. Recommendations for reporting cost-effectiveness analyses. Panel on Cost-Effectiveness in Health and Medicine. *JAMA*. 1996;276(16):1339-1341.
37. Weinstein MC, Siegel JE, Gold MR, Kamlet MS, Russell LB. Recommendations of the Panel on Cost-effectiveness in Health and Medicine. *JAMA*. 1996;276(15):1253-1258.

38. Lipscomb J, Weinstein MC, Torrance GW. Time preference. In: Gold MR, Siegel JE, Russell LB, Weinstein MC, eds. *Cost-effectiveness in health and medicine*. New York, NY: Oxford University Press; 1996:214-235.
39. Sanders GD, Neumann PJ, Basu A, et al. Recommendations for Conduct, Methodological Practices, and Reporting of Cost-effectiveness Analyses: Second Panel on Cost-Effectiveness in Health and Medicine. *Jama*. 2016;316(10):1093-1103.
40. Vatn MH, Stalsberg H. The prevalence of polyps of the large intestine in Oslo: an autopsy study. *Cancer*. 1982;49(4):819-825.
41. Williams AR, Balasooriya BA, Day DW. Polyps and cancer of the large bowel: a necropsy study in Liverpool. *Gut*. 1982;23(10):835-842.
42. Clark JC, Collan Y, Eide TJ, et al. Prevalence of polyps in an autopsy series from areas with varying incidence of large-bowel cancer. *International journal of cancer Journal international du cancer*. 1985;36(2):179-186.
43. Arminski TC, McLean MD. Incidence and distribution of adenomatous polyps of the colon and rectum based on 1,000 autopsy examinations. *Dis Colon Rectum*. 1964;7:249-261.
44. Rickert RR, Auerbach O, Garfinkel L, Hammond EC, Frasca JM. Adenomatous lesions of the large bowel: an autopsy survey. *Cancer*. 1979;43(5):1847-1857.
45. Wagner JL, Tunis S, Brown M, Ching A, Almeida R. Cost-effectiveness of colorectal cancer screening in average risk adults. In: Young G, Rozen P, Levin B, eds. *Prevention and early detection of colorectal cancer*. Philadelphia: WB Saunders; 1996:321-356.

46. Ries LAG, Kosary CL, Hankey BF, Miller BA, Hurray A, Edwards BK, eds. *SEER Cancer Statistics Review, 1973-1994*. NIH Pub. No. 97-2789. Bethesda, MD: National Cancer Institute; 1997.
47. Bernold DM, Sinicrope FA. Advances in chemotherapy for colorectal cancer. *Clin Gastroenterol Hepatol*. 2006;4(7):808-821.
48. Cunningham D, Humblet Y, Siena S, et al. Cetuximab monotherapy and cetuximab plus irinotecan in irinotecan-refractory metastatic colorectal cancer. *N Engl J Med*. 2004;351(4):337-345.
49. Goldberg RM, Sargent DJ, Morton RF, et al. A randomized controlled trial of fluorouracil plus leucovorin, irinotecan, and oxaliplatin combinations in patients with previously untreated metastatic colorectal cancer. *J Clin Oncol*. 2004;22(1):23-30.
50. Hurwitz H, Fehrenbacher L, Novotny W, et al. Bevacizumab plus irinotecan, fluorouracil, and leucovorin for metastatic colorectal cancer. *N Engl J Med*. 2004;350(23):2335-2342.
51. Kabbinavar F, Hurwitz HI, Fehrenbacher L, et al. Phase II, randomized trial comparing bevacizumab plus fluorouracil (FU)/leucovorin (LV) with FU/LV alone in patients with metastatic colorectal cancer. *J Clin Oncol*. 2003;21(1):60-65.
52. Meyerhardt JA, Mayer RJ. Systemic therapy for colorectal cancer. *N Engl J Med*. 2005;352(5):476-487.
53. Saltz LB, Meropol NJ, Loehrer PJ, Sr., Needle MN, Kopit J, Mayer RJ. Phase II trial of cetuximab in patients with refractory colorectal cancer that expresses the epidermal growth factor receptor. *J Clin Oncol*. 2004;22(7):1201-1208.

54. Winawer SJ, Fletcher RH, Miller L, et al. Colorectal cancer screening: clinical guidelines and rationale. *Gastroenterology*. 1997;112(2):594-642.
55. Imperiale TF, Ransohoff DF, Itzkowitz SH, et al. Multitarget stool DNA testing for colorectal-cancer screening. *N Engl J Med*. 2014;370(14):1287-1297.
56. van Rijn JC, Reitsma JB, Stoker J, Bossuyt PM, van Deventer SJ, Dekker E. Polyp miss rate determined by tandem colonoscopy: a systematic review. *Am J Gastroenterol*. 2006;101(2):343-350.
57. Pickhardt PJ, Choi JR, Hwang I, et al. Computed tomographic virtual colonoscopy to screen for colorectal neoplasia in asymptomatic adults. *N Engl J Med*. 2003;349(23):2191-2200.
58. Lin JS, Piper MA, Perdue LA, et al. Screening for Colorectal Cancer: An Updated Systematic Review for the U.S. Preventive Services Task Force. *AHRQ Publication No 14-05203-EF-1*. 2015.
59. Rabeneck L, Paszat LF, Hilsden RJ, et al. Bleeding and perforation after outpatient colonoscopy and their risk factors in usual clinical practice. *Gastroenterology*. 2008;135(6):1899-1906, 1906 e1891.
60. Gatto NM, Frucht H, Sundararajan V, Jacobson JS, Grann VR, Neugut AI. Risk of perforation after colonoscopy and sigmoidoscopy: a population-based study. *J Natl Cancer Inst*. 2003;95(3):230-236.
61. Anderson ML, Pasha TM, Leighton JA. Endoscopic perforation of the colon: lessons from a 10-year study. *Am J Gastroenterol*. 2000;95(12):3418-3422.
62. Ramsey SD, Andersen MR, Etzioni R, et al. Quality of life in survivors of colorectal carcinoma. *Cancer*. 2000;88(6):1294-1303.



## Supplementary Tables

### Supplementary Table 1. Model Inputs

| Variable                                                       | Base Case Value<br>(Range)*  | References                                                                                                                          |
|----------------------------------------------------------------|------------------------------|-------------------------------------------------------------------------------------------------------------------------------------|
| Clinical                                                       |                              |                                                                                                                                     |
| Polyp prevalence at age 50, %                                  | 15                           | Vatn, et al., 1982 (40), Williams, et al., 1982(41), Clark, et al., 1985(42)                                                        |
| small polyp, %                                                 | 95                           | Williams, et al., 1982(41), Arminski, et al., 1964(43), Rickert, et al., 1979(44)                                                   |
| large polyp, %                                                 | 5                            | Williams, et al., 1982(41), Arminski, et al., 1964(43), Rickert, et al., 1979(44)                                                   |
| Annual transition rate to small polyp from normal, %           | Age specific,<br>1.1-1.9     | Vatn, et al., 1982 (40), Williams, et al., 1982(41), Clark, et al., 1985(42), Arminski, et al., 1964(43), Rickert, et al., 1979(44) |
| Annual transition rate to large polyp from small polyp, %      | 1.5                          | Williams, et al., 1982(41), Arminski, et al., 1964(43), Rickert, et al., 1979(44)                                                   |
| Annual transition rate to cancer without polypoid precursor, % | Age specific,<br>0.006-0.086 | Vatn, et al., 1982 (40), Williams, et al., 1982(41), Clark, et al., 1985(42), Wagner, et al., 1996 (45), Ries, et al., 1997, (46)   |
| Annual transition rate to cancer from large polyp, %           | 5                            | Vatn, et al., 1982 (40), Williams, et al., 1982(41), Clark, et al., 1985(42), Wagner, et al., 1996 (45), Ries, et al., 1997, (46)   |
| Symptomatic presentation of localized cancer, %                | 22/y over 2y                 | Ries, et al., 1997, (46)                                                                                                            |
| Symptomatic presentation of regional cancer, %                 | 40/y over 2y                 | Ries, et al., 1997, (46)                                                                                                            |
| Mortality rate from treated localized cancer, %                | 1.74/y in first 5y           | Ries, et al., 1997, (46)                                                                                                            |
| Mortality rate from treated regional cancer, %                 | 8.6/y in first 5y            | Ries, et al., 1997, (46)                                                                                                            |
| Mean survival from distant cancer, y                           | 1.9                          | Ries, et al., 1997, (46), Bernold, et al., 2006(47), Cunningham, et al., 2004(48), Goldberg, et al., 2004(49), Hurwitz, et al.,     |

|                                                           |                  |                                                                                               |
|-----------------------------------------------------------|------------------|-----------------------------------------------------------------------------------------------|
|                                                           |                  | 2004(50), Kabbinavar, et al., 2003(51), Meyerhardt, et al., 2005(52), Saltz, et al., 2004(53) |
| Mortality rate from cancer treatment, %                   | 2                | Wagner, et al., 1996 (45), Winawer, et al., 1997(54)                                          |
| <b>Test performance characteristics and complications</b> |                  |                                                                                               |
| FIT sensitivity for cancer, %                             | 73.3 (60.3-83.9) | Imperiale, et al., 2014(55)                                                                   |
| FIT sensitivity for large polyp, %                        | 23.8 (20.8-27.0) | Imperiale, et al., 2014(55)                                                                   |
| FIT sensitivity for small polyp, %                        | 7.6 (6.7-8.6)    | Imperiale, et al., 2014(55)                                                                   |
| FIT specificity, %                                        | 96.4 (95.8-96.9) | Imperiale, et al., 2014(55)                                                                   |
| Colonoscopy sensitivity for cancer, %                     | 95 (90-97)       | van Rijn, et al., 2006(56), Pickhardt, et al., 2003(57)                                       |
| Colonoscopy sensitivity for large polyp, %                | 90 (85-95)       | van Rijn, et al., 2006(56), Pickhardt, et al., 2003(57)                                       |
| Colonoscopy sensitivity for small polyp, %                | 85 (80-90)       | van Rijn, et al., 2006(56), Pickhardt, et al., 2003(57)                                       |
| Colonoscopy major hemorrhage rate, %                      | 0.08 (0.05-0.14) | Lin, et al., 2015(58)                                                                         |
| Colonoscopy perforation rate, %                           | 0.04 (0.02-0.05) | Lin, et al., 2015(58)                                                                         |
| Mortality rate given endoscopic perforation, %            | 7.5 (4.5-16)     | Rabeneck, et al., 2008(59), Gatto, et al., 2003(60), Anderson, et al., 2000(61)               |
| <b>Health state utilities</b>                             |                  |                                                                                               |
| Localized colorectal cancer                               | 0.90 (SD 0.06)   | Ramsey, et al., 2000(62)                                                                      |
| Regional colorectal cancer                                | 0.80 (SD 0.22)   | Ramsey, et al., 2000(62)                                                                      |
| Distant colorectal cancer                                 | 0.76 (SD 0.11)   | Ramsey, et al., 2000(62)                                                                      |
| <b>Costs, \$</b>                                          |                  |                                                                                               |
| FIT                                                       | 19.64            | Centers for Medicare & Medicaid Services, 2018(29)                                            |
| Colonoscopy                                               | 710              | Centers for Medicare & Medicaid Services, 2018(30)                                            |
| Colonoscopy with lesion removal                           | 1,013            | Centers for Medicare & Medicaid Services, 2018(30)                                            |

|                                                           |        |                                                                                                        |
|-----------------------------------------------------------|--------|--------------------------------------------------------------------------------------------------------|
| Major hemorrhage after colonoscopy                        | 6,096  | Centers for Medicare & Medicaid Services, 2018(30), Centers for Medicare & Medicaid Services, 2018(31) |
| Perforation after colonoscopy                             | 16,599 | Centers for Medicare & Medicaid Services, 2018(30), Centers for Medicare & Medicaid Services, 2018(31) |
| Colorectal cancer care by stage                           |        |                                                                                                        |
| Localized, initial                                        | 35,888 | Zauber, et al., 2007(32)                                                                               |
| Localized, continuing yearly                              | 2,856  | Zauber, et al., 2007(32)                                                                               |
| Localized, colorectal cancer death                        | 64,335 | Zauber, et al., 2007(32)                                                                               |
| Regional, initial                                         | 60,387 | Zauber, et al., 2007(32)                                                                               |
| Regional, continuing yearly                               | 3,805  | Zauber, et al., 2007(32)                                                                               |
| Regional, colorectal cancer death                         | 67,598 | Zauber, et al., 2007(32)                                                                               |
| Distant, initial                                          | 78,854 | Zauber, et al., 2007(32)                                                                               |
| Distant, colorectal cancer death                          | 90,721 | Zauber, et al., 2007(32)                                                                               |
| FIT outreach related costs                                |        |                                                                                                        |
| FIT kit                                                   | 4.50   | Current study                                                                                          |
| FIT kit processing cost                                   | 15.14  | Current study                                                                                          |
| FIT outreach (not including the cost of FIT kit)          | 18.47  | Current study                                                                                          |
| Implementation and training cost once every 10 years      | 2.97   | Current study                                                                                          |
| Navigation cost for colonoscopy after a positive FIT test |        |                                                                                                        |
| Completer cost                                            | 28.83  | Jandorf, et al., 2013(34), Ladabaum, et al., 2015(35)                                                  |
| Non-completer cost                                        | 21.4   | Jandorf, et al., 2013(34), Ladabaum, et al., 2015(35)                                                  |

---

\*FIT, fecal immunochemical testing; SD, standard deviation; y, year.

**Supplementary Table 2. Colonoscopy follow-up rates after abnormal FIT tests among those assigned to usual care and outreach intervention**

| Clinic | Outreach            |                      |              | Usual Care          |                      |              |
|--------|---------------------|----------------------|--------------|---------------------|----------------------|--------------|
|        | No. of FIT Positive | No. of Colonoscopies | Follow-up, % | No. of FIT Positive | No. of Colonoscopies | Follow-up, % |
| 1      | 52                  | 36                   | 69.2         | 23                  | 16                   | 69.6         |
| 2      | 13                  | 9                    | 69.2         | 6                   | 3                    | 50.0         |
| 3      | 21                  | 8                    | 38.1         | 7                   | 5                    | 71.4         |
| 4      | 29                  | 12                   | 41.4         | 12                  | 6                    | 50.0         |
| 5      | 20                  | 11                   | 55.0         | 25                  | 12                   | 48.0         |
| 6      | 44                  | 12                   | 27.3         | 19                  | 8                    | 42.1         |
| 7      | 13                  | 9                    | 69.2         | 5                   | 2                    | 40.0         |
| 8      | 16                  | 9                    | 56.3         | 14                  | 5                    | 35.7         |
| Total  | 208                 | 106                  | 51.0         | 111                 | 57                   | 51.4         |

**Supplementary Table 3. Patient responses to reminder calls**

| <b>Barrier</b>                                                | <b>Responses, n (%)</b> | <b>Up-to-date after call, %</b> |
|---------------------------------------------------------------|-------------------------|---------------------------------|
| Forgot/Not a priority/Busy                                    | 330 (26.4)              | 62.7                            |
| Returned test already/completed test but not mailed           | 300 (24.0)              | 90.7                            |
| Did not receive/lost test/did not check the mail/test damaged | 191 (15.3)              | 61.8                            |
| Did not understand how to complete test                       | 133 (10.7)              | 77.4                            |
| Other health problems/stool/bowel movement                    | 115 (9.2)               | 54.8                            |
| Not in residence for extended period                          | 66 (5.3)                | 54.5                            |
| Doesn't want the test/wants colonoscopy/ doesn't see need     | 46 (3.7)                | 23.9                            |
| Other                                                         | 38 (3.0)                | 50.0                            |
| Too embarrassing or unpleasant/fearful of results             | 30 (2.4)                | 50.0                            |
| <b>Total</b>                                                  | <b>1249 (100.0)</b>     | <b>67.6</b>                     |

**Supplementary Table 4. Startup Costs**

| <b>Itemized Cost</b>     | <b>Units</b> | <b>Unit cost</b> | <b>Total cost</b> |
|--------------------------|--------------|------------------|-------------------|
| Audio Processor          | 2            | \$68.87          | \$137.74          |
| Headset                  | 2            | \$99.45          | \$198.90          |
| Docking station          | 3            | \$130.89         | \$392.67          |
| Computers                | 2            | \$1,359.20       | \$2,718.40        |
| Computer                 | 1            | \$1,653.58       | \$1,653.58        |
| Printer                  | 1            | \$685.34         | \$685.34          |
| Keyboard Trays           | 2            | \$289.90         | \$579.80          |
| Furniture                | 1            | \$3,705.65       | \$3,705.65        |
| Keyboards                | 3            | \$15.39          | \$46.17           |
| Mouse                    | 3            | \$16.93          | \$50.79           |
| Warranty                 | 3            | \$129.99         | \$389.97          |
| Phones                   | 3            | \$246.67         | \$740.00          |
| Health Coaching Training | 3            | \$500.00         | \$1,500.00        |
| UCSF/SFGH Startup        | --           | --               | \$885.42          |
| Training                 | --           | --               | \$2,312.28        |
| <b>Total</b>             | --           | --               | <b>\$15,997</b>   |

**Supplementary Table 5. Effectiveness and cost effectiveness of organized outreach versus usual care\***

| <b>Clinical Scenarios</b>                                                                                                                                                                                                                                  | <b>Comparison Groups</b>   | <b>Key variable</b> | <b>QALY/<br/>person</b> | <b>Cost/<br/>person</b> | <b>Cost/QALY<br/>gained by<br/>annual FIT-<br/>outreach<br/>vs. usual<br/>care</b> |
|------------------------------------------------------------------------------------------------------------------------------------------------------------------------------------------------------------------------------------------------------------|----------------------------|---------------------|-------------------------|-------------------------|------------------------------------------------------------------------------------|
| FIT uptake: 57.9% with outreach (participation 45.3% consistent, 25.1% intermittent, 29.6% never) vs. 37.4% with usual care (participation 21.2% consistent, 32.5% intermittent and 46.3% never) – Base case (55.6% Follow-up Colonoscopy)                 | Usual Care<br>Intervention | --<br>--            | 19.6103<br>19.6259      | \$2,816<br>\$2,960      | \$9,200/<br>QALY                                                                   |
| FIT uptake: 66.1% with outreach (participation 51.8% consistent, 28.6% intermittent, 19.6% never) vs. 36.1% with usual care (participation 20.4% consistent, 31.4% intermittent and 48.2% never) – SA1 (Participation rates – largest effect)              | Usual Care<br>Intervention | --<br>--            | 19.6090<br>19.6330      | \$2,832<br>\$2,854      | \$900/<br>QALY                                                                     |
| FIT uptake: 52.4% with outreach (participation 41.1% consistent, 22.7% intermittent, 36.2% never) vs. 38.7% with usual care (participation 21.9% consistent, 33.6% intermittent and 44.5% never) – SA2 (Participation rates – smallest effect)             | Usual Care<br>Intervention | --<br>--            | 19.6114<br>19.6212      | \$2,800<br>\$3,029      | \$23,400/<br>QALY                                                                  |
| FIT uptake: 57.9% with outreach (participation 45.3% consistent, 25.1% intermittent, 29.6% never) vs. 37.4% with usual care (participation 21.2% consistent, 32.5% intermittent and 46.3% never) – SA3 (Cost of FIT outreach-including FIT Kit cost: \$10) | Usual Care<br>Intervention | --<br>--            | 19.6103<br>19.6259      | \$2,816<br>\$2,749      | FIT<br>outreach<br>dominates                                                       |
| FIT uptake: 57.9% with outreach (participation 45.3% consistent, 25.1% intermittent, 29.6% never) vs. 37.4% with usual care (participation 21.2% consistent, 32.5% intermittent and 46.3% never) – SA4 (Cost of FIT outreach-including FIT Kit cost: \$50) | Usual Care<br>Intervention | --<br>--            | 19.6103<br>19.6259      | \$2,816<br>\$3,399      | \$37,400/<br>QALY                                                                  |

FIT uptake: 57.9% with outreach (participation 45.3% consistent, 25.1% intermittent, 29.6% never) vs. 37.4% with usual care (participation 21.2% consistent, 32.5% intermittent and 46.3% never) – SA5 (varied rate of follow-up colonoscopy after abnormal FIT)

|              |                             |         |         |              |
|--------------|-----------------------------|---------|---------|--------------|
|              | Follow-up colonoscopy rate: |         |         |              |
| Usual care   | 55%                         | 19.6101 | \$2,818 |              |
| Intervention | Follow-up colonoscopy rate: | 19.6312 | \$2,872 | \$2,500/QALY |
|              | 75%                         |         |         |              |

FIT uptake: 57.9% with outreach (participation 45.3% consistent, 25.1% intermittent, 29.6% never) vs. 37.4% with usual care (participation 21.2% consistent, 32.5% intermittent and 46.3% never) – SA6 (varied rate of follow-up colonoscopy after abnormal FIT with added cost of navigation for follow-up colonoscopy in FIT outreach group)

|                        |                                          |         |         |              |
|------------------------|------------------------------------------|---------|---------|--------------|
|                        | Follow-up colonoscopy rate:              |         |         |              |
| Usual Care             | 55%                                      | 19.6101 | \$2,818 |              |
| Intervention           | Follow-up colonoscopy rate:              | 19.6312 | \$2,882 | \$3,000/QALY |
| +                      | 75% + Cost of navigation for colonoscopy |         |         |              |
| colonoscopy navigation |                                          |         |         |              |

---

\*Abbreviations: FIT, fecal immunochemical test; QALY, quality adjusted life years; SA, sensitivity analysis



## Supplementary Figures

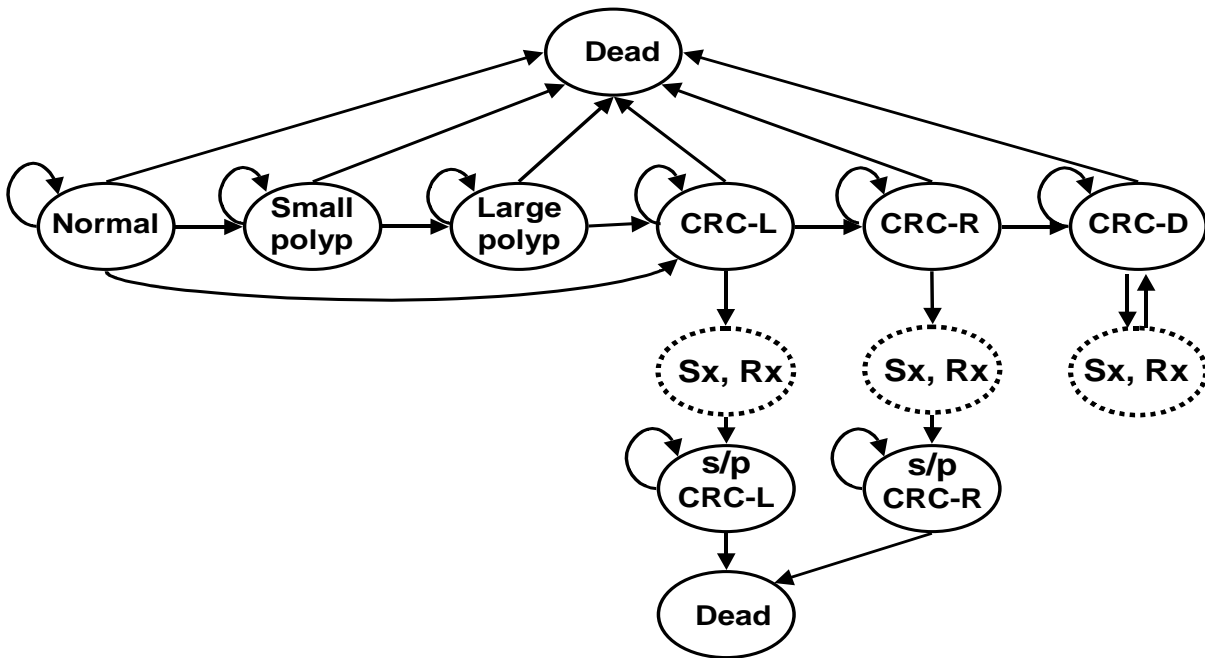

**Supplementary Figure 1. Schematic of the natural history module in the decision analytic model.** The principal health states in the model are normal, small adenomatous polyp, large adenomatous polyp, localized colorectal cancer (CRC-L), regional colorectal cancer (CRC-R), disseminated colorectal cancer (CRC-D), alive following treatment for localized colorectal cancer (s/p CRC-L), alive following treatment for regional colorectal cancer (s/p CRC-R), and dead. Without screening, colorectal cancer is diagnosed and treated (Rx) only after symptoms (Sx) develop.

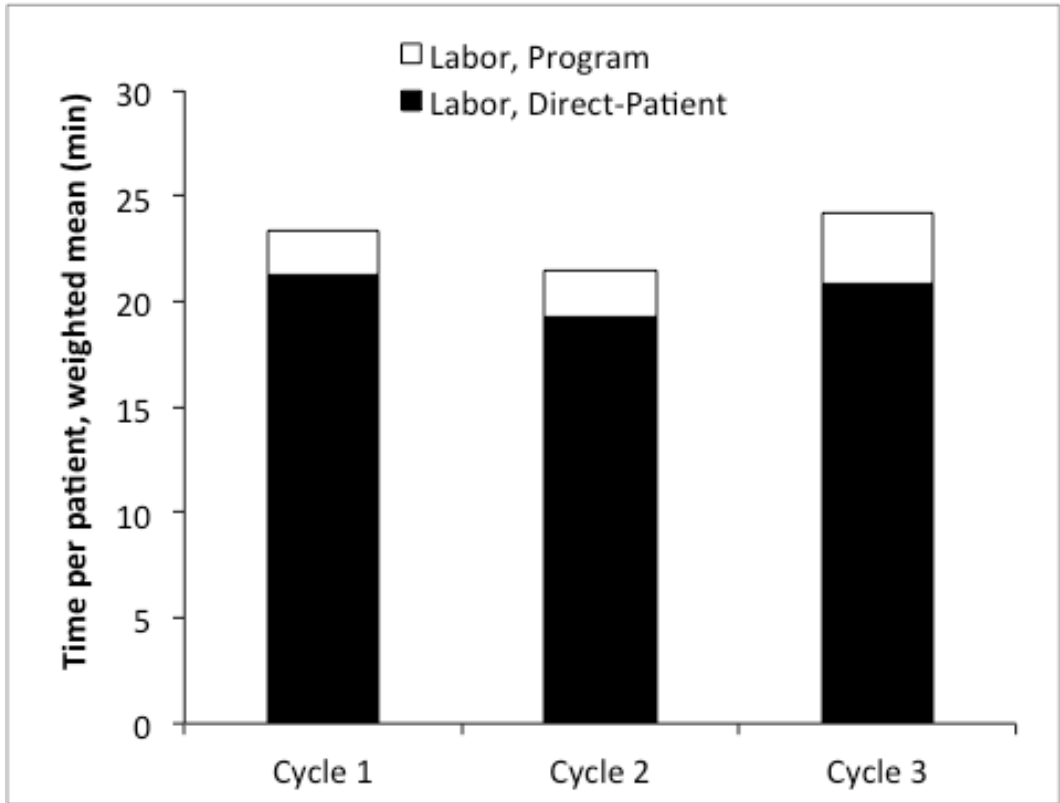

**Supplementary Figure 2. Average time spent per patient during three cycles of organized outreach.**

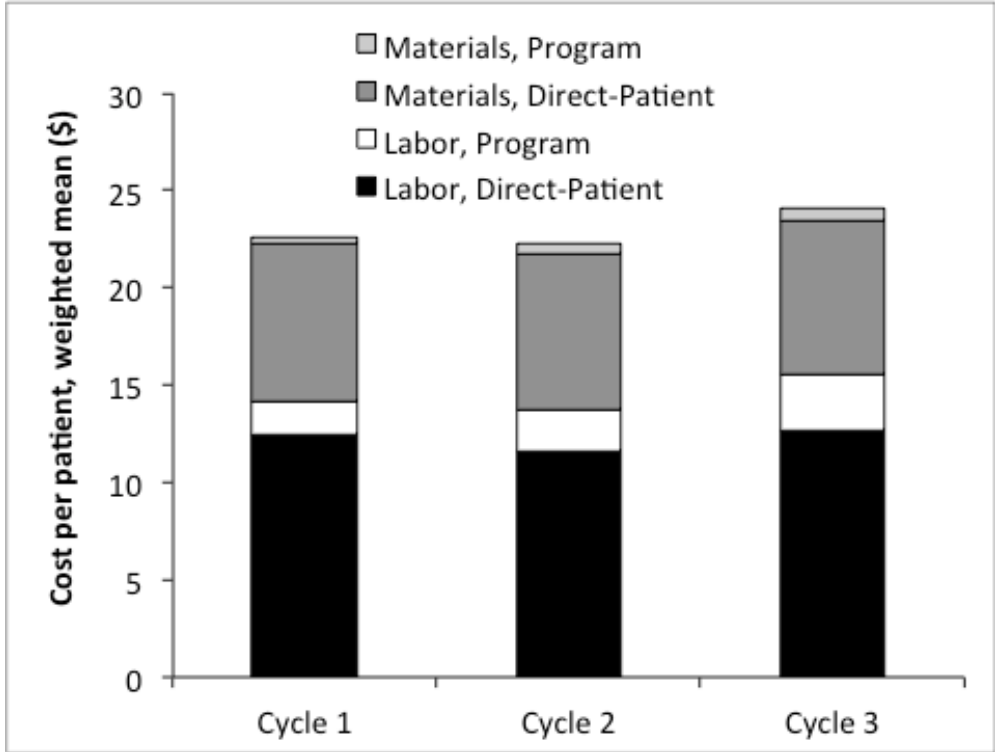

**Supplementary Figure 3. Average cost per patient during three cycles of organized outreach.**
